# Supplementary material for: The efficient enrichment of marine peptides from the protein hydrolysate of the marine worm Urechis unicinctus by using mesoporous materials MCM-41, SBA-15 and CMK-3
Source: Royal Society of Chemistry journal article supplement (doi:10.1039/d1ay00616a), 2021-01-01
Supplement: d1ay00616a1.pdf [file d1ay00616a1.pdf]

## Supplementary Information

### **The efficient enrichment of marine peptides from protein hydrolysate of marine worm *Urechis unicinctus* by mesoporous materials MCM-41, SBA-15 and CMK-3**

Xinwei Li <sup>a</sup>, Yueyun Ma <sup>a</sup>, Yijin Zuo <sup>a</sup>, Zonghao Liu <sup>a</sup>, Qiukuan Wang <sup>abc</sup>, Dandan Ren<sup>abc</sup>, Yunhai He<sup>abc</sup>, Haihua Cong<sup>abc</sup>, Long Wu<sup>abc\*</sup>, Hui Zhou <sup>abc\*</sup>

<sup>a</sup> College of Food Science and Engineering, Dalian Ocean University, Dalian, Liaoning 116023, Chian

<sup>b</sup> National R&D Branch Center for Seaweed Processing, Dalian Ocean University, Dalian 116023, China

<sup>c</sup> Key Laboratory of Aquatic Product Processing and Utilization of Liaoning Province, Dalian Ocean University, Dalian 116023, China

\*E-mail addresses: zhouhui@dlou.edu.cn (Hui Zhou); wulong@dlou.edu.cn (Long Wu)

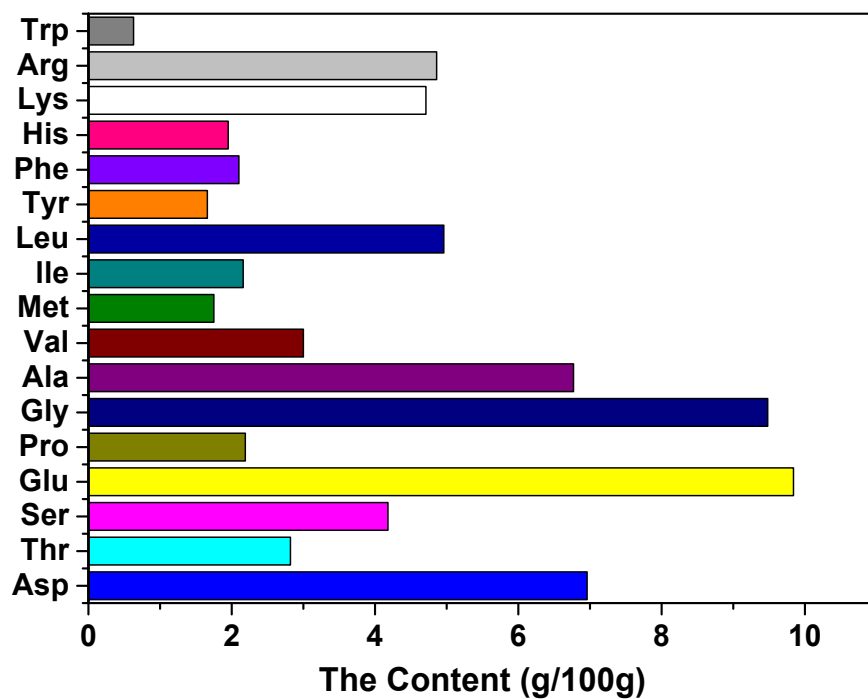

Fig. S1 Amino acid composition of the marine worm *Urechis unicinctus*

Table S1 Nutritional evaluation of essential amino acids in marine worm *Urechis unicinctus*

| Amino acid | Content (mg/g) | FAO/WHO ideal model (mg/g) | Whole egg proteins model (mg/g) | AAS   | CS    |
|------------|----------------|----------------------------|---------------------------------|-------|-------|
| Thr        | 28.23±0.49     | 40                         | 45                              | 0.706 | 0.627 |
| Val        | 29.96±0.81     | 60                         | 66                              | 0.499 | 0.454 |
| Met        | 17.50±0.01     | 35                         | 59                              | 0.500 | 0.297 |
| Ile        | 21.65±0.53     | 40                         | 50                              | 0.541 | 0.433 |
| Leu        | 49.64±0.94     | 70                         | 85                              | 0.709 | 0.584 |
| Phe+Tyr    | 37.58±1.28     | 50                         | 95                              | 0.752 | 0.396 |
| Lys        | 47.15±3.22     | 55                         | 67                              | 0.857 | 0.704 |
| Trp        | 6.35±0.34      | 10                         | 17                              | 0.635 | 0.373 |
| EAAI       |                |                            | 0.9790                          |       |       |

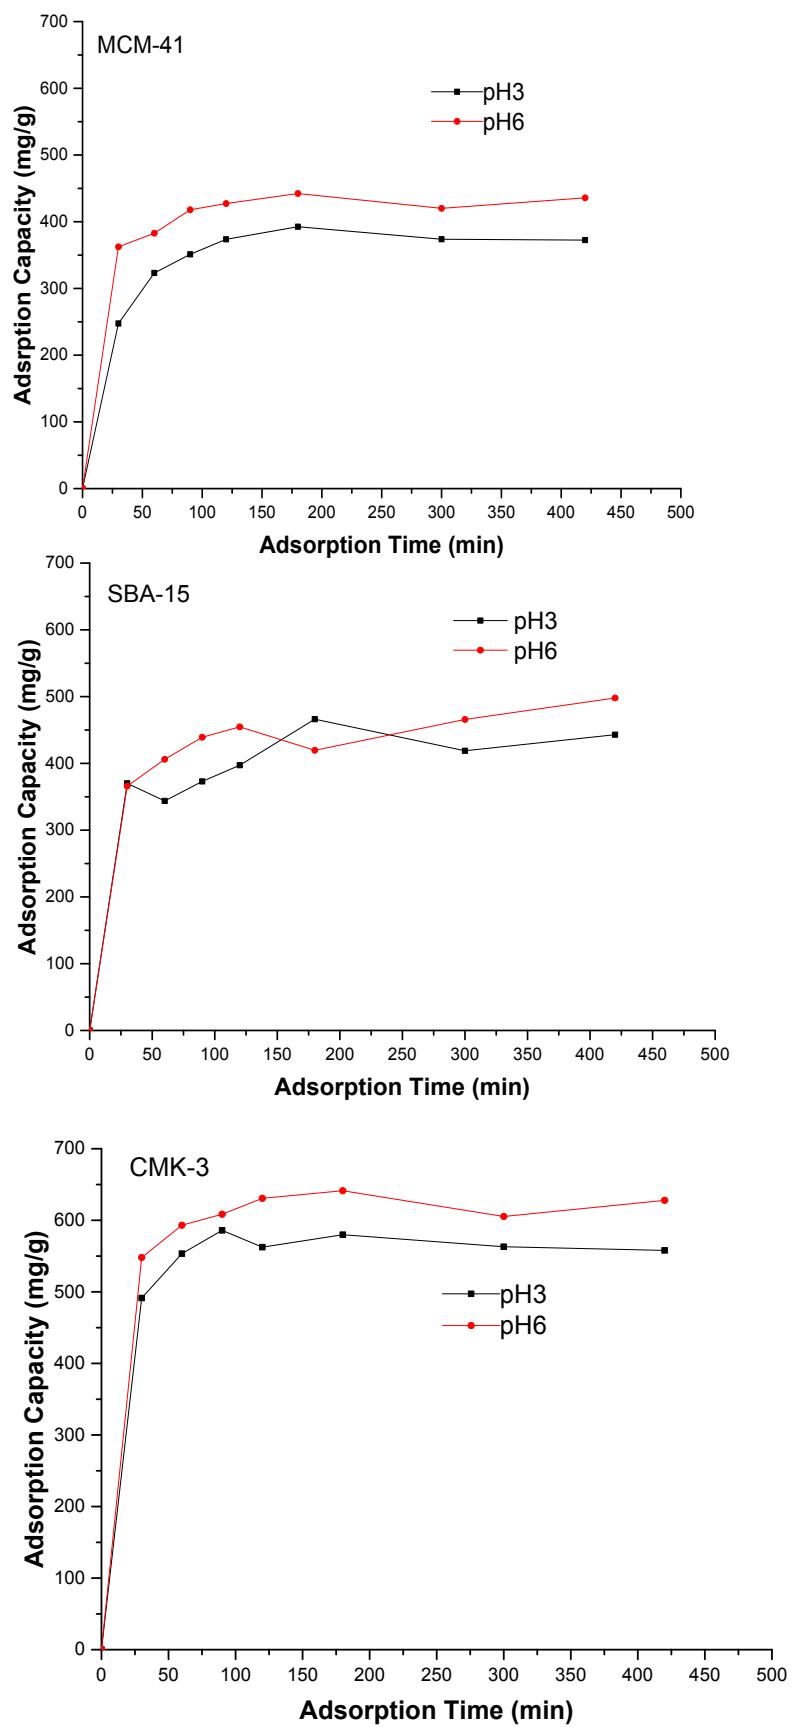

Fig.S2 Time profiles of WWPH adsorption on MCM-41, SBA-15 and CMK-3 at pH 3 and pH 6
